# Supplementary material
Source: publisher site journal article supplement (https://www.degruyterbrill.com/publication/journal_key/ECON/downloadAsset/ECON_ECON_Instruction%20for%20Authors.pdf)
Supplement: Supplementary file 1 [file ECON_ECON_Instruction%20for%20Authors.pdf]

# Instructions for Authors

EFFECTIVE MAY 2024

---

## Scope

*Economics* is an open-access open-assessment journal, devoted to the publication of original research in all fields of economics. Inevitably, articles in different areas of economics are addressed at different audiences. Many of the articles submitted to the journal are standard technical pieces, addressed to a purely academic audience. Others concern economic policy and thus are addressed both to economists and policy makers with some economic background. Yet others are surveys and overviews, often interdisciplinary, addressed to a nontechnical audience.

## Editorial Policy

### Unpublished material

Submission of a manuscript implies that the work described is not copyrighted, published or submitted elsewhere, except in abstract form. The corresponding author should ensure that all authors approve the manuscript before its submission.

### Conflict of interest

When authors submit a manuscript, they are responsible for recognizing and disclosing financial and/or other conflicts of interest that might bias their work and/or could inappropriately influence his/her judgment. In case no conflict of interest exists, authors should state so.

### Financial support

If authors received specific grant from any funding agency, commercial or not for-profit sectors it should be clearly stated during the submission.

### Copyright

All authors retain copyright, unless – due to their local circumstances – their work is not copyrighted. The use of each article will be governed by the [Creative Commons Attribution license](#). The corresponding author grants De Gruyter the license to use of the article, by signing the **License to Publish**. Scanned copy of the completed License to Publish should be sent to the journal, as soon as possible.

### Authorship

Authorship should be limited to those who have made a significant contribution to the conception, design, execution, or interpretation of the reported study. All those who have made significant contributions should be listed as co-authors. Where there are others who have participated in certain substantive aspects of the research project, they should be named in an Acknowledgement section. ***The list of authors cannot be changed after the original submission without the permission of the Editorial Office. Any changes in the co-authorship list will be a subject of investigation and will require authors to adhere to Editorial Office recommendations.*** For more details about the role of authors please see: <https://www.degruyter.com/publishing/for-authors/for-journal-authors/role-of-authors>.

### Data sharing policy

**The journal requires authors to follow data sharing policy available on [our website](#).** We encourage authors to make the data available for the public. We offer a possibility to publish additional files together with the article as Supplementary Materials (see details in the **Supplemental Material** section). Data and other materials can be also stored using one of the repositories (such as Open Science Framework, <https://osf.io>), preferably selected from those indexed on [FAIRsharing.org](https://fairsharing.org) or [re3data.org](https://re3data.org).

The decision to publish the article will not be affected by whether or not authors share their research data.

### Peer review process

**Initial check:** The Editors reserve the right to decline the submitted manuscript without review, if the studies reported are not sufficiently novel or important to merit publication in the journal. Manuscripts deemed unsuitable (insufficient originality or of limited interest to the target audience) are returned to the author(s) without review.

*Economics* uses an open-assessment model of reviews. Manuscripts that pass the initial check are available online as discussion papers for at least 8 weeks, and everyone can send their comments. Link to discussion papers is available on the journal's website.

The Editor seeks advice from experts in the appropriate field. **Research articles, review articles, and communications are refereed by a minimum of two reviewers.** Editor can decide whether comments provided to the discussion paper are profound and meet the requirements of a review. Please note that not all comments can be regarded as a review. Only contribution that fulfill the expected level of details and expertise and contribute to the assessment of the vital aspects of the article can be counted as reviews. For more information, please consult Guidelines for reviewers available on the journal's website.

All reviews are published together with the final version of the article as supplementary files.

Authors are requested to suggest persons competent to review their manuscript. However, please note that this will be treated only as a suggestion, and the final selection of reviewers is exclusively the Editor's decision. The final decision of acceptance is made by Managing Editor or, in case of conflict, by the Editor-in-Chief.

#### Scientific misconduct

This journal publishes only original manuscripts that are not also published or going to be published elsewhere. Multiple submissions/publications, or redundant publications (re-packaging in different words of data already published by the same authors) will be rejected. If they are detected only after publication, the journal reserves the right to publish a Retraction Note. In each particular case the Editors will follow [COPE's Core Practices](#) and implement its advice.

#### Electronic Submission

*Economics* encourages the submission of both substantial full-length bodies of work and shorter manuscripts that report novel findings. There are no specific length restrictions for the overall manuscript or individual sections; however, we urge the authors to present and discuss their findings in a concise and accessible manner. **We recommend a length of 5,000–12,000 words, excluding the bibliography and figure captions.**

All submitted manuscripts **must be written in the English language. Please note that all co-authors will receive a notification e-mail after submission and be required to register and confirm their co-authorship.** The progress of the editorial process will depend on fulfilment of this condition.

Manuscripts submitted under multiple authorship are reviewed on the assumption that all listed authors concur in the submission and are responsible for its content; they must have agreed to its publication and have given the corresponding author the authority to act on their behalf in all matters pertaining to publication. The corresponding author is responsible for informing the co-authors about the manuscript status throughout the submission, review, and production process. All submissions must be made via [online submission system Editorial Manager](#). In case of problems, please contact our Editorial Office.

#### Publication Formats

*Economics* considers submissions of:

- **Research Article** – The default format for reporting research results. There is no length restriction.
- **Brief Report** – A shorter form of a Research Article, suitable for small-scale research or research in the early stages of development.
- **Review Article** – Used to submit literature reviews on a topic of interest. The article should contain a broad, balanced and fair perspective of the topic, identifying trends and/or gaps in the literature or providing a new synthesis of existing literature. Reviews should be scientifically sound and should describe the most relevant and recent contributions.

- **Mini-Review Article** – A shorter form of a Review Article intended for a brief analysis of a focused topic on advances in the field. It discusses recent experimental research, highlights recent developments in fast-moving areas and suggests areas that require additional research.
- **Communication** – This format is intended for the presentation of brief observations that do not warrant full-length papers. An empirical report resulting from analysis of collected data to address one or more research questions and/or hypotheses.

### Electronic Formats Allowed

We accept submissions of text, tables and figures as separate files or as a composite file. For your initial submission, we recommend you upload your entire manuscript, including tables and figures, as a single PDF file. If you are invited to submit a revised manuscript, please provide us with individual files: an editable text and publication-quality figures.

- Text files can be submitted in the following formats:
  - ❖ MS Word – standard DOCUMENT (.docx/.doc) – **preferred format**
  - ❖ PDF (not applicable for re-submitted or accepted manuscripts, see below).
- **Tables** should be submitted as MS Word or PDF (not applicable for re-submitted or accepted manuscripts, see below). Please note that a straight Excel file is not an acceptable format.
- **Graphics files** can be submitted in any of the following graphic formats: EPS; BMP; JPG; TIFF; GIF or PDF. Please note that Powerpoint files are not accepted.

Post-acceptance, text files of the revised manuscript and tables are required for use in the production. **Authors should clearly indicate the location(s) of tables and figures in the text** if these elements are given separately or at the end of the manuscript. If this information is not provided to the editorial office, we will assume that they should be left at the end of the text. **Important: if any of the figures used are copyrighted, authors need to obtain permission from the copyright owner to reproduce these figures. The source of the figure has to be acknowledged in the figure legends.**

### First-Time Submission of Manuscripts

It is important that authors include a cover letter with their manuscript. Please explain why you consider your manuscript to be suitable for publication in *Economics*, why your paper will inspire the other members of your field, and how will it drive the academic discussion forward.

### Submission of Revised Articles

Resubmitted manuscripts should be accompanied by a letter outlining a point-by-point response to the Editor's and reviewers' comments and detailing the changes made to the manuscript. A copy of the original manuscript should be included for comparison if the Editor requests one. If it is the first revision, the authors need to return the revised manuscript within **28 days**; if it is the second revision, the authors need to return the revised manuscript within **14 days**. Additional time for resubmission must be requested in advance. If the above-mentioned deadlines are not met, the manuscript will be treated as a new submission.

***For re-submitted manuscripts, please provide us with an editable text and publication-quality figures. Supply any figures as separate high-resolution, print-ready digital versions.*** In addition to the editorial remarks, the authors are asked to take care that they have prepared the revised version according to the Journal's style.

### Organization of the Manuscript

We draw particular attention to the importance of carefully preparing the title, keywords and abstract, as these elements are indicators of the manuscript content in bibliographic databases and search engines.

#### Title

We suggest that the title should be informative, specific to the project, yet concise (75 characters or fewer). Please bear in mind that a title that is comprehensible to a broad academic audience and readers outside your field will attract a wider readership. Avoid specialist abbreviations and non-standard acronyms. Titles should not be presented in title case (words should not be capitalized). Please also provide a brief "running title" of not more than 50 characters.

### Authors, affiliations, addresses

Please provide the first names (or initials – if used), middle names (or initials – if used), and surnames for all authors. Affiliations should include:

- Department
- University or organization
- City
- Postal code (*optional*)
- State/province (*optional*)
- Country

One of the authors should be designated as the corresponding author to whom inquiries regarding the paper should be directed. It is the corresponding author's responsibility to ensure that the author list and the summary of the author contributions to the study are accurate and complete.

### Abstract

The abstract should not exceed **200 words**. The abstract should give a summary of the content of the paper. Mention the main findings without going into methodological details and summarize briefly the most important items of the paper. Because the abstract will be published separately by abstracting services, it must be complete and understandable without reference to the text. Please note that abstract has to be copied into submission form in our system that has limit of 200 words and it would not accept longer abstracts.

### Keywords

List keywords for the work presented (maximum of 5), separated by commas. We suggest keywords that do not replicate those used in the title.

### Author's Statements (For detailed information please see our Author's statement document)

Acknowledgements (if applicable)

Funding information (**mandatory**)

Author contributions (**mandatory**)

Conflict of interest (**mandatory**)

Data availability statement (**mandatory**)

*Please note, we encourage authors to place the bulk of the mathematical expressions in appendices.*

### References

Please use the American Psychological Association style ([APA 7<sup>th</sup> edition](#)) for the reference list and in-text citations. References should be listed in the alphabetical order at the end of the paper. A complete reference list should give the reader enough information to find the relevant article. Please pay particular attention to spelling, capitalization and punctuation.

#### In-text citations

- If more than one study is cited, organize the citations alphabetically by the first author's surname
- Multiple citations within a single set of parentheses should be separated by semicolons

Cash (2002) argued that...

...which was supported by later research (Cash, 2002)

In 2002, Cash argued that...

Grabe et al. (2008) discussed...

...the evidence for this claim was provided (Grabe et al., 2008)

In 2008, Grabe et al. discussed...

#### Reference list

- Reference list entries should be alphabetized by the last name of the first author of each work
- For multiple articles by the same author, or authors listed in the same order, list the entries in chronological order, from earliest to most recent

- Present the journal title in full
- When a DOI (digital object identifier) of an article is available, include it in the reference
- When no DOI is assigned and the article is retrieved online, give the URL of the publication home page
- If it is a paper article, you do not have to provide URL or DOI

#### Journal article with one to twenty authors

*Format:* Author, A. A., Author, B. B., & Author, C. C. (year). Title of article. *Title of Periodical*, volume number(issue number), pp-pp. doi

Wnuk, S. M., Greenberg, L., & Dolhanty, J. (2015). Emotion-focused group therapy for women with symptoms of bulimia nervosa. *Eating Disorders*, 23, 253–261.

#### Journal article with more than twenty authors

Strauman, T. J., Vieth, A. Z., Merrill, K. A., Kolden, G. G., Woods, T. E., Klein, M. H., ... Kwapil, L. (2006). Self-system therapy as an intervention for self-regulatory dysfunction in depression: A randomized comparison with cognitive therapy. *Journal of Consulting and Clinical Psychology*, 74, 367–376.

#### Journal article in press

Briscoe, R. (in press). Egocentric spatial representation in action and perception. *Philosophy and Phenomenological Research*. Retrieved from <http://cogprints.org/5780/1/ECSRAP.F07.pdf>

- Do not give a date until the article has actually been published
- Give the exact URL because the article is informally published and not yet indexed on a journal website

#### Books and book chapters

Author, A. A. (Year of publication). *Title of work: Capital letter also for subtitle*. Publisher. doi

Litchenberger, E. O., & Kaufman, A. S. (2009). *Essentials of WAIS-IV assessment*. Wiley.

Cash, T. F. (2002). Cognitive-Behavioral Perspectives on Body Image. In T. F. Cash & T. Pruzinsky (Eds.), *Body Image: A Handbook of Theory, Research, and Clinical Practice* (pp. 38-46). Guildford Press.

#### **Formatting and typesetting**

**All pages must be numbered consecutively.** The whole text (including legends, footnotes, and references) should be formatted with no hyphenation and automatic word-wrap (no hard returns within paragraphs). Please type your text consistently, e.g. take care to distinguish between ‘1’ (one), ‘I’ (capital I) and ‘l’ (lower-case L) and ‘0’ (zero) and ‘O’ (capital O), etc. The font size should be no smaller than 12 points. Footnotes and endnotes should be avoided. Allowable footnotes/endnotes may include: the designation of the corresponding author of the paper, the current address of the author (if different from that shown in the affiliation), abbreviations and acronyms.

#### **Symbols and abbreviations**

The use of special symbols, abbreviations, and acronyms is permitted as long as they are defined upon first mention in the article.

#### **Supplemental material**

We encourage authors to submit essential supplementary files that additionally support the authors' conclusions along with their manuscripts (**the principal conclusions should be fully supported without referral to the supplemental material**). Supplemental material will always remain associated with its article and is not subject to any modifications after publication. The decision to publish the material with the article if it is accepted will be made by the Editor. Supporting files of **no more than 10 MB** in may be submitted in a variety of formats, but should be publication-ready, as these files will be published exactly as supplied. Material must be restricted to large or complex data sets or results that cannot be readily displayed because of space or technical limitations. Material that has been published previously is not acceptable for posting as supplemental material.

Supporting files should fall into one of the following categories:

- Dataset
- Additional Figure or Table
- Text
- Protocol
- Multimedia - Audio/Video/Animations (AVI, MPEG, WAV, Quicktime, animated GIF or Flash).

If the software required for users to view/use the supplemental material is not embedded in the file, you are urged to use shareware or generally available/easily accessible programs. To prevent any misunderstandings, we request that authors submit a text file (instruction.txt) containing a brief instruction on how to use the files supplied.

## **Outline of the Production Process**

Once an article has been accepted for publication, the manuscript files are transferred into our production system to be formatted. Technical editors reserve the privilege of editing manuscripts to conform to the stylistic conventions of the journal. Once the article has been typeset, PDF proofs are generated so that authors can approve all editing and layout.

### **Electronic Proofs**

Proofreading should be carried out once a final draft has been produced. ***Since the proofreading stage is the last opportunity to correct the article to be published, the authors are requested to make every effort to check for errors in their proofs before the paper is posted online.*** Please note that only essential changes can be made at this stage and extensive corrections, additions, or deletions will not be allowed. Limit changes to correction of spelling errors, incorrect data, grammatical errors, and updated information for references to articles that have been submitted or are in press. If URLs have been provided in the article, recheck the sites to ensure that the addresses are still accurate and the material that you expect the reader to find is indeed there. Important new information that has become available between acceptance of the manuscript and receipt of the proofs may be inserted into the proof with the permission of the editor.

Additionally, authors may be asked to address remarks and queries from the technical editors. Queries are written only to request necessary information or clarification of an unclear passage or to draw attention to edits that may have altered the sense. Please note that editors do not query at every instance where a change has been made. It is the author's responsibility to read the entire text, tables, and figure legends, not just items queried. Major alterations made will always be submitted to the authors for approval.

Manuscripts submitted under multiple authorship are published on the assumption that the final version of the manuscript has been seen and approved by all authors. The Corresponding author will receive e-mail notification when a downloadable PDF file is available and should return comments on the proofs within a maximum of 3 days of receipt. Comments should be included in the assigned file or prepared in a separate list. Please note that they should not be faxed, nor mailed or sent by a courier service to the Editorial Office. In case of any difficulties please contact the Journal Office.

### **Immediate Publication**

Manuscripts ready for publication are promptly posted online. The manuscripts are considered to be ready for publication when the final proofreading has been performed by authors, and all concerns have been resolved. Authors should notice that no changes can be made to the articles after online publication.

### **Erratum**

If any errors are detected in the published material, they should be reported to the Editor in Chief and Managing Editor. The corresponding author(s) should send the appropriate corrected material to the Managing Editor via email. The material will be considered for publication as soon as possible.

For more information on De Gruyter publishing ethics please visit: <https://www.degruyter.com/publishing/for-authors/for-journal-authors/publishing-ethics>
